# Supplementary material
Source: publisher figshare collection journal article supplement (https://karger.figshare.com/ndownloader/files/38271303)
Supplement: Supplementary file 1 [file 38271303]

**Supplementary Table S1.** Baseline characteristics of participants who were and were not included in this analysis

|  | **Included N=428** | | **Not included**  **N=271** | **P-value** |
| --- | --- | --- | --- | --- |
| **Participant characteristics [n(%) or mean ± SD]** |  | |  |  |
| Age (years) | 14 ± 2 | | 14 ± 2 | 0.15 |
| Sex |  | |  | 0.60 |
| Male | 148 (34.6) | | 99 (36.5) |  |
| Female | 280 (65.4) | | 172 (63.5) |  |
| Race/ethnicity |  | |  | 0.06 |
| Non-Hispanic White | 77 (18.0) | | 65 (24.0) |  |
| Non-Hispanic Black | 154 (67.8) | | 73 (32.2) |  |
| Hispanic | 165 (38.6) | | 113 (41.7) |  |
| Other | 32 (7.5) | | 20 (7.4) |  |
| TODAY Treatment group |  | |  | 0.60 |
| Metformin | 148 (34.6) | | 84 (31.0) |  |
| Metformin + rosiglitazone | 141 (32.9) | | 92 (34.0) |  |
| Metformin + intensive lifestyle | 139 (32.5) | | 95 (35.1) |  |
| BMI (kg/m2) | 35.1 ± 7.6 | | 34.8 ± 7.8 | 0.58 |
| HbA1c (%) | 6.0 ± 0.8 | | 6.0 ± 0.7 | 0.31 |
| Duration of diabetes (years) | 0.7 ± 0.5 | | 0.7 ± 0.5 | 0.54 |
| Highest level of education in the household |  | |  | 0.004 |
| Less than high school | 111 (26.2) | | 71 (27.1) |  |
| High school/GED*/business or technical | 124 (29.3) | | 48 (18.3) |  |
| At least some college | 189 (44.6) | | 143 (54.6) |  |
| Annual household income |  | |  | <0.001 |
| <$25,000 | 176 (45.7) | | 83 (34.7) |  |
| $25,000 - $49,999 | 133 (34.6) | | 77 (32.2) |  |
| ≥$50,000 | 76 (19.7) | | 79 (33.1) |  |
| Data are n (%) or mean ± SD  *General Educational Development test: equivalent of high school diploma | |  |  |  |
